# Supplementary material for: Repeat Size Determination by Two Molecular Rulers in the Type I-E CRISPR Array
Source: PubMed Central journal article supplement — Cell Rep. 2016 Sep 13;16(11):2811–8. doi: 10.1016/j.celrep.2016.08.043 (PMC5039180; doi:10.1016/j.celrep.2016.08.043), 2016-09-13
Supplement: mmc1.pdf [file mmc1.pdf]

**Cell Reports, Volume 16**

**Supplemental Information**

**Repeat Size Determination by Two Molecular  
Rulers in the Type I-E CRISPR Array**

**Moran G. Goren, Shany Doron, Rea Globus, Gil Amitai, Rotem Sorek, and Udi Qimron**

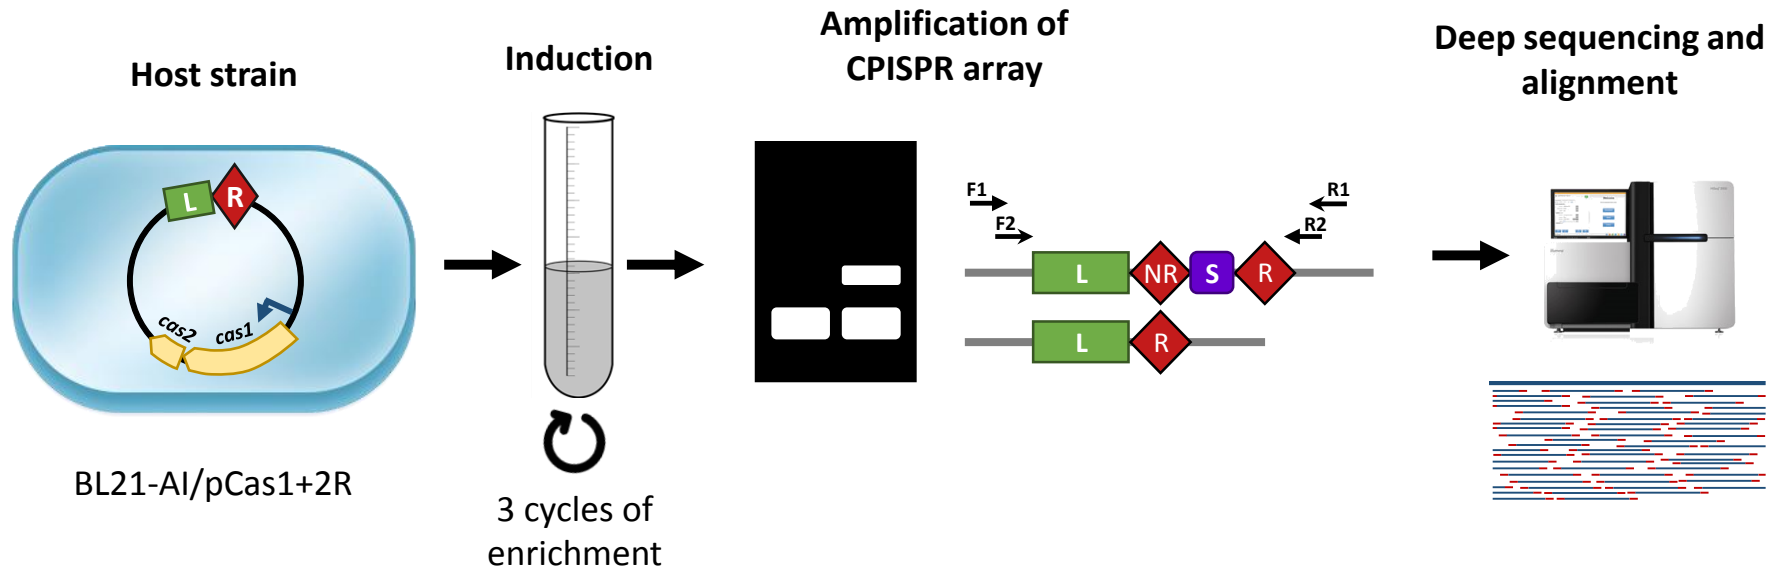

**Figure S1; Related to Figures 1, 2, and 3. Assay for monitoring the effects of repeat modification on adaptation.** A plasmid encoding Cas1–Cas2 and a leader–repeat sequence, occasionally with modifications to the WT sequence, was transformed into *E. coli* BL21-AI. Bacteria were induced to express Cas1–Cas2, grown, diluted, and grown again, three times in total. A sample of the culture was then taken for PCR1 using primers F1–R1. PCR2 was generated following gel extraction of the adapted band using primers F2–R2. Both products were analyzed using high-throughput DNA sequencing.

**Table S1. Bacterial strains, plasmids and oligonucleotides used in this study. Related to Experimental Procedures.**

| Bacterial strains                                                                                       | Description/sequence                                                                                                                                                                                            | Source or reference               |
|---------------------------------------------------------------------------------------------------------|-----------------------------------------------------------------------------------------------------------------------------------------------------------------------------------------------------------------|-----------------------------------|
| NEB5 $\alpha$                                                                                           | F <sup>-</sup> $\phi$ 80 <i>lacZ</i> $\Delta$ M15 $\Delta$ ( <i>lacZYA-argF</i> ) U169 <i>deoR recA1 endA1 hsdR17</i> ( $r_k^-$ , $m_k^+$ ) <i>gal^- phoA supE44 <math>\lambda^-</math> thi^-1 gyrA96 relA1</i> | New England Biolabs               |
| IYB5283                                                                                                 | BL21-AI with no repeats in CRISPR I, kan <sup>r</sup> , tet <sup>r</sup>                                                                                                                                        | (Yosef et al., 2012) <sup>a</sup> |
| <b>Plasmids</b>                                                                                         |                                                                                                                                                                                                                 |                                   |
| pCas1+2                                                                                                 | pCDF-1b (Novagen) cloned with <i>cas1,2</i> under T7 promoter, str <sup>r</sup>                                                                                                                                 | (Yosef et al., 2012) <sup>a</sup> |
| pCas1+2R (WT)                                                                                           | pCDF-1b (Novagen) cloned with <i>cas1,2</i> under T7 promoter, minimal leader and single repeat of CRISPR 1 array, str <sup>r</sup>                                                                             | This study                        |
| <b>The following plasmids are identical to pCas1+2R except for the repeat sequence specified below:</b> |                                                                                                                                                                                                                 |                                   |
| S1                                                                                                      | TGTGTCCCCGCGCCAGCGGGGATAAACC                                                                                                                                                                                    | This study                        |
| S2                                                                                                      | GTGTTCCCCGCTAACGCGGGGATAAACC                                                                                                                                                                                    | This study                        |
| S3                                                                                                      | GTGTTCCCCGCGCCAGCGGGGAGCCAA                                                                                                                                                                                     | This study                        |
| S4                                                                                                      | GTGTGAAAATAGCCATATTTTCTAAACC                                                                                                                                                                                    | This study                        |
| S5                                                                                                      | GTGTGAAAATAGCCAGCGGGGATAAACC                                                                                                                                                                                    | This study                        |
| S6                                                                                                      | GTGTTCCCCGCGCCATATTTTCTAAACC                                                                                                                                                                                    | This study                        |
| S7                                                                                                      | GTGTAGGGGCGGCCAGCCCCCTAAACC                                                                                                                                                                                     | This study                        |
| D1                                                                                                      | G_GTTCCCCGCGCCAGCGGGGATAAACC                                                                                                                                                                                    | This study                        |
| D2                                                                                                      | GTGT_CCCCCGCGCCAGCGGGGATAAACC                                                                                                                                                                                   | This study                        |
| D3                                                                                                      | GTGTTCC_CGCGCCAGCGGGGATAAACC                                                                                                                                                                                    | This study                        |
| D4                                                                                                      | GTGTTCCCCGC_CAGCGGGGATAAACC                                                                                                                                                                                     | This study                        |
| D5                                                                                                      | GTGTTCCCCGCG_CAGCGGGGATAAACC                                                                                                                                                                                    | This study                        |
| D6                                                                                                      | GTGTTCCCCGCGCC_GCGGGGATAAACC                                                                                                                                                                                    | This study                        |
| D7                                                                                                      | GTGTTCCCCGCGCCAGCGGG_ATAAACC                                                                                                                                                                                    | This study                        |
| D8                                                                                                      | GTGTTCCCCGCGCCAGCGGGGA_AAACC                                                                                                                                                                                    | This study                        |
| D9                                                                                                      | GTGTTCCCCGCGCCAGCGGGGATAA_CC                                                                                                                                                                                    | This study                        |
| D10                                                                                                     | GTGTTCCCCGCGCCAGCGGGGATAAAC.                                                                                                                                                                                    | This study                        |
| I1                                                                                                      | GTGTTCCCCGCGCCAGCGGGGATAAACC                                                                                                                                                                                    | This study                        |
| I2                                                                                                      | GTGTTCC_CCGCGCCAGCGGGGATAAACC                                                                                                                                                                                   | This study                        |
| I3                                                                                                      | GTGTTCCCCGCGGCCAGCGGGGATAAACC                                                                                                                                                                                   | This study                        |
| I4                                                                                                      | GTGTTCCCCGCGCC_CAGCGGGGATAAACC                                                                                                                                                                                  | This study                        |
| I5                                                                                                      | GTGTTCCCCGCGCCAAGCGGGGATAAACC                                                                                                                                                                                   | This study                        |
| I6                                                                                                      | GTGTTCCCCGCGCCAGCGGGGATAAACC                                                                                                                                                                                    | This study                        |
| I7                                                                                                      | GTGTTCCCCGCGCCAGCGGGGAT_TAAACC                                                                                                                                                                                  | This study                        |
| I8                                                                                                      | GTGTTCCCCGCGCCAGCGGGGATAAACC                                                                                                                                                                                    | This study                        |
| D5S1                                                                                                    | GTGTTCCCCGCGCAACGGGGATAAACC                                                                                                                                                                                     | This study                        |
| D5S2                                                                                                    | GTGTTCCCCGCGCAGAGGGGATAAACC                                                                                                                                                                                     | This study                        |
| D5S3                                                                                                    | GTGTTCCCCGCGCAGCAGGGATAAACC                                                                                                                                                                                     | This study                        |
| D5S4                                                                                                    | GTGTTCCCCGCGCAGCAGGATAAACC                                                                                                                                                                                      | This study                        |
| D5S5                                                                                                    | GTGTTCCCCGCGCAGCGGAGATAAACC                                                                                                                                                                                     | This study                        |
| D5S6                                                                                                    | GTGTTCCCCGCGCAGAAAGGATAAACC                                                                                                                                                                                     | This study                        |
| I4S1                                                                                                    | GTGTTCCAAACGCCAGCGGGGATAAACC                                                                                                                                                                                    | This study                        |
| <b>Oligonucleotides</b> 5'→3'                                                                           |                                                                                                                                                                                                                 |                                   |
| OA2F                                                                                                    | CCTTTGATCTTTTCTACTGA                                                                                                                                                                                            |                                   |
| OA2R                                                                                                    | ATGGGGCTGACTTCAGGTGC                                                                                                                                                                                            |                                   |
| RE10RD                                                                                                  | NNNNTGGATGTGTTGTTTGTG                                                                                                                                                                                           |                                   |
| IY230R1                                                                                                 | NNNNAATGAGCGATGATATTTGTGCT                                                                                                                                                                                      |                                   |
| MG132F                                                                                                  | GTTATGTTAGATGTGTCCCCGCGCCAGCGG                                                                                                                                                                                  |                                   |
| MG132R                                                                                                  | CCGCTGGCGCGGGGACACATCTAAACATAAC                                                                                                                                                                                 |                                   |
| MG82F                                                                                                   | GCGGGGATAAACCAGCACA                                                                                                                                                                                             |                                   |
| MG86R                                                                                                   | GTTAGCGGGGAACACTCTAAACATAACCTATTAT                                                                                                                                                                              |                                   |
| MG126F                                                                                                  | GCCCAAGAGCACAAATATCATCGCTC                                                                                                                                                                                      |                                   |
| MG126R                                                                                                  | TCCCCGCTGGCGCGGGGAACACTC                                                                                                                                                                                        |                                   |
| MG85F                                                                                                   | TATTTTCTAAACCGAGCACAAATATCA                                                                                                                                                                                     |                                   |
| MG85R                                                                                                   | TGGCTATTTTCACTCTAAACATAACCTATTAT                                                                                                                                                                                |                                   |
| MG197F                                                                                                  | GAAAATAGCCAGCGGGGATAAACCAGAG                                                                                                                                                                                    |                                   |
| MG197R                                                                                                  | AACTCTAAACATAACCTAT                                                                                                                                                                                             |                                   |
| MG198F                                                                                                  | TATTTTCTAAACCGAGCACAAATATCA                                                                                                                                                                                     |                                   |

|        |                                   |
|--------|-----------------------------------|
| MG198R | TGGCGCGGGGAACACTCTAA              |
| MG88F  | CGCCCCTTAAACCGAGCACAAA            |
| MG196R | TGGCCGCCCTACACTCTAAACAT           |
| MG199F | GTTCCCCGCGCCAGCGGGGA              |
| MG199R | CTCTAAACATAACCTATTAT              |
| MG200F | TCCCCGCGCCAGCGGGGATA              |
| MG200R | CACTCTAAACATAACCTATT              |
| MG218F | TGTTTAGAGTGTTCCCCGCGCCAGCGGGGAT   |
| MG218R | ATCCCCGCTGGCGCGGGGAACACTCTAAACA   |
| MG202F | CCAGCGGGGATAAACCGAGC              |
| MG202R | GCGGGGAACACTCTAAACAT              |
| MG203F | CAGCGGGGATAAACCGAGCAC             |
| MG203R | CGCGGGGAACACTCTAAAC               |
| MG204F | GCGGGGATAAACCGAGCACA              |
| MG204R | GGCGCGGGGAACACTCTAAA              |
| MG205F | GGATAAACCGAGCACAAATA              |
| MG215R | CCCGCTGGCGCGGGGAACACT             |
| MG206F | AAACCGAGCACAAATATCAT              |
| MG216R | AATCCCCGCTGGCGCGGGGAA             |
| MG219F | GCGCCAGCGGGGATAACCGAGCACAAATAT    |
| MG219R | ATATTTGTGCTCGGTTATCCCCGCTGGCGC    |
| MG208F | CGAGCACAAATATCATCGCT              |
| MG208R | TTTATCCCCGCTGGCGCGGG              |
| MG200F | TCCCCGCGCCAGCGGGGATA              |
| MG210R | AACACTCTAAACATAACCTAT             |
| MG201F | CGCGCCAGCGGGGATAAACCC             |
| MG211R | GGGGAACACTCTAAACATAAC             |
| MG202F | CCAGCGGGGATAAACCGAGC              |
| MG212R | CCGCGGGGAACACTCTAAACA             |
| MG203F | CAGCGGGGATAAACCGAGCAC             |
| MG213R | GGCGCGGGGAACACTCTAAAC             |
| MG204F | GCGGGGATAAACCGAGCACA              |
| MG214R | TTGGCGCGGGGAACACTCTAA             |
| MG205F | GGATAAACCGAGCACAAATA              |
| MG215R | CCCGCTGGCGCGGGGAACACT             |
| MG206F | AAACCGAGCACAAATATCAT              |
| MG216R | AATCCCCGCTGGCGCGGGGAA             |
| MG220F | CGCCAGCGGGGATAAACCGAGCACAAATAT    |
| MG220R | ATATTTGTGCTCGGTTTTATCCCCGCTGGCG   |
| MG243F | AGTGTTCCCCGCGCAACGGGGATAAACCGAG   |
| MG243R | CTCGGTTTATCCCCGTTGCGCGGGGAACACT   |
| MG244F | GTGTTCCCCGCGCAGAGGGGATAAACCGAGC   |
| MG244R | GCTCGGTTTATCCCCTCTGCGCGGGGAACAC   |
| MG245F | TGTTCCCCGCGCAGCAGGGATAAACCGAGCA   |
| MG245R | TGCTCGGTTTATCCCTGCTGCGCGGGGAACA   |
| MG246F | GTTCCCCGCGCAGCGAGGATAAACCGAGCAC   |
| MG246R | GTGCTCGGTTTATCCTCGCTGCGCGGGGAAC   |
| MG247F | TTCCCCGCGCAGCGGAGATAAACCGAGCACA   |
| MG247R | TGTGCTCGGTTTATCTCCGCTGCGCGGGGAA   |
| MG248F | GTGTTCCCCGCGCAGAAAGGATAAACCGAGCAC |
| MG248R | GTGCTCGGTTTATCCTTTCTGCGCGGGGAACAC |
| MG239F | TGTTTAGAGTGTTCCAAACGCCAGCGGGGATA  |
| MG239R | TATCCCCGCTGGCGGTTTGGAACTCTAAACA   |

<sup>a</sup>Yosef, I., Goren, M.G., and Qimron, U. (2012). Proteins and DNA elements essential for the CRISPR adaptation process in *Escherichia coli*. *Nucleic Acids Res* 40, 5569-5576.

**Table S2. Primers and templates used for plasmid construction. Related to Experimental Procedures.**

| <b>Plasmid</b> | <b>Primers for PCR</b> | <b>DNA template</b> |
|----------------|------------------------|---------------------|
| S1             | MG132F, MG132R         | pCas1+2R            |
| S2             | MG82F, MG86R           | "                   |
| S3             | MG126F, MG126R         | "                   |
| S4             | MG85F, MG85R           | "                   |
| S5             | MG197F, MG197R         | "                   |
| S6             | MG198F, MG198R         | "                   |
| S7             | MG88F, MG196R          | "                   |
| D1             | MG199F, MG199R         | "                   |
| D2             | MG200F, MG200R         | "                   |
| D3             | MG218F, MG218R         | "                   |
| D4             | MG202F, MG202R         | "                   |
| D5             | MG203F, MG203R         | "                   |
| D6             | MG204F, MG204R         | "                   |
| D7             | MG205F, MG215R         | "                   |
| D8             | MG206F, MG216R         | "                   |
| D9             | MG219F, MG219R         | "                   |
| D10            | MG208F, MG208R         | "                   |
| I1             | MG200F, MG210R         | "                   |
| I2             | MG201F, MG211R         | "                   |
| I3             | MG202F, MG212R         | "                   |
| I4             | MG203F, MG213R         | "                   |
| I5             | MG204F, MG214R         | "                   |
| I6             | MG205F, MG215R         | "                   |
| I7             | MG206F, MG216R         | "                   |
| I8             | MG220F, MG220R         | "                   |
| D5S1           | MG243F, MG243R         | "                   |
| D5S2           | MG244F, MG244R         | "                   |
| D5S3           | MG245F, MG245R         | "                   |
| D5S4           | MG246F, MG246R         | "                   |
| D5S5           | MG247F, MG247R         | "                   |
| D5S6           | MG248F, MG248R         | "                   |
| I4S1           | MG239F, MG239R         | "                   |

## Supplemental Experimental Procedures. Related to Experimental Procedures.

### Reagents, strains and plasmids

Lysogeny broth (LB) medium (1% w/v tryptone, 0.5% w/v yeast extract, 0.5% w/v NaCl) and agar were from Acumedia. Antibiotics and L-arabinose were from Calbiochem. Isopropyl- $\beta$ -D-thiogalactopyranoside (IPTG) was from Bio-Lab. Restriction enzymes, T4 polynucleotide kinase, Antarctic phosphatase and Quick Ligation Kit were from New England Biolabs. KAPA HiFi HotStart Ready Mix was from Kapa Biosystems. Taq DNA polymerase was from LAMDA Biotech. NucleoSpin Gel and PCR Clean-Up Kit were from Geneaid. The bacterial strains, plasmids and oligonucleotides used in this study are listed in Supplementary Table 1.

### Plasmid construction

Plasmids were constructed using standard molecular biology techniques according to the manufacturers' instructions.

pCas1+2R plasmid encodes Cas1, Cas2 and a type I-E CRISPR array of a leader and a single repeat. pCas1+2R was constructed by amplifying the leader and repeat sequences of array I from the BL21-AI genome using oligonucleotides OA1F and OA1R (Supplementary Table 1). The amplified DNA was digested by *Xba*I and *Spe*I and ligated to *Xba*I-linearized pCas1+2 (Supplementary Table 1). The ligation yielded pCas1+2R plasmid that was further sequenced to exclude mutations introduced during cloning. The various mutant repeat plasmids were constructed using bidirectional PCR (repeats S2-S7, D1, D2, D4-D8, D10, and I1-I7) or site-directed mutagenesis (repeats S1, D3, D9, I8, D5S1-D5S6, and I4S1) methods. Plasmids constructed by bidirectional PCR were amplified using oligonucleotide pairs facing opposite directions followed by phosphorylation and self-ligation. Plasmids constructed by site-directed mutagenesis utilized complementary oligonucleotide pairs, each carrying the desired mutation with 15 bases of homologous sequence on both sides. Supplementary Table 2 lists the oligonucleotide combinations used to construct the various plasmids. Newly constructed plasmids were introduced into *E. coli* strain NEB5 $\alpha$  by electroporation and sequenced to verify that the desired mutation was obtained. Once verified, the plasmids were purified from strain NEB5 $\alpha$  and introduced into *E. coli* strain IYB5283 (Supplementary Table 1).

### PCR products for deep sequencing

DNA of bacterial cultures subjected to acquisition assay was amplified in two consecutive PCRs termed PCR1 and PCR2. In PCR1, the reaction contained 25  $\mu$ L Taq 2X Master Mix, 1.25  $\mu$ L of 10 mM OA2F and OA2R primers (Supplementary Table 1), 5  $\mu$ L bacterial culture and 16.5  $\mu$ L double-distilled water. The PCR started with 3 min at 95°C followed by 35 cycles of 20 s at 95°C, 20 s at 55°C and 20 s at 72°C. The final extension step at 72°C was performed for 5 min. Part of the PCR1 content (20  $\mu$ L) was purified using the DNA Clean-Up Kit and used for standard library preparation procedures followed by deep sequencing (MiSeq), while the remainder (30  $\mu$ L) was loaded on a 1.8% (w/v) agarose gel and electrophoresed for 120 min at 120 V. Following electrophoresis, the expanded band was excised from the gel and purified using the DNA Clean-Up Kit. The extracted band served as the template for PCR2 aimed at amplifying the expanded CRISPR-array products. PCR2 contained 15  $\mu$ L Taq 2X Master Mix, 0.5  $\mu$ L of 10 mM RE10RD and IY230R1 primers (Supplementary Table 1), 2 ng of the gel-extracted DNA from PCR1 and double-distilled water to 20  $\mu$ L. The PCR2 cycling program was identical to that of PCR1. The entire PCR2 content was loaded on a 1.8% agarose gel, electrophoresed, excised and purified from the gel under the same conditions as in PCR1, and used for standard library preparation procedures followed by deep sequencing (NextSeq500).
